# Supplementary material for: Repurposing Drugs for Mayaro Virus: Identification of EIDD-1931, Favipiravir and Suramin as Mayaro Virus Inhibitors
Source: MDPI journal article supplement (doi:10.3390/microorganisms9040734), 2021-03-31
Supplement: s1 [file s1]

**A**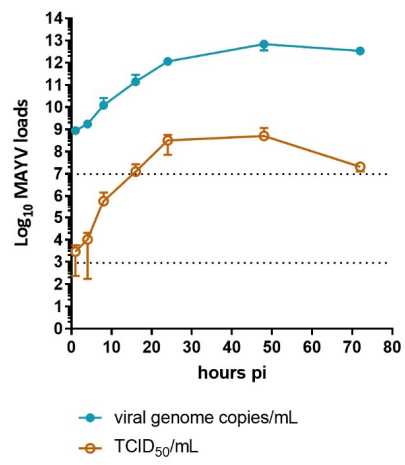**B**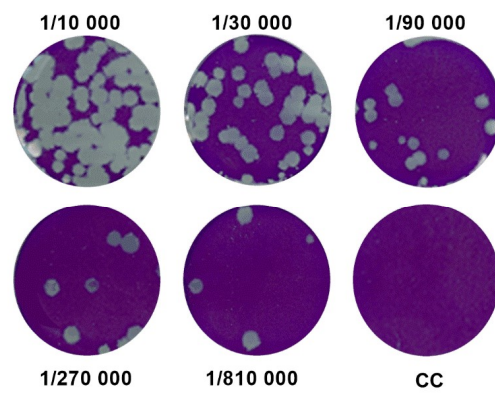

**Figure 1.** Viral fitness of MAYV in Vero cells.
